# Supplementary material
Source: publisher figshare collection journal article supplement (https://springernature.figshare.com/ndownloader/files/18037064)
Supplement: Supplementary file 1 [file 18037064]

## Sheet: Table S2
Table S2: The detailed information of Ka/Ks for TALE family homologs in different Gossypium species.
BEL1-Like family
A2/GhAt		Ka/Ks	（Ka Ks）	A2/GbAt		Ka/Ks	（Ka Ks）	D5/GhDt		Ka/Ks	（Ka Ks）	D5/GbDt		Ka/Ks	（Ka Ks）	GhAt/GhDt		Ka/Ks	（Ka Ks）	GbAt/GbDt		Ka/Ks	（Ka Ks）	A2/D5		Ka/Ks	（Ka Ks）
Cotton_A_00390	Gh_A01G1895	N	(0.0024 0.0000)	Cotton_A_00390	GOBAR_AA33911	0.7548	(0.0151 0.0200)	Gorai.001G023100	Gh_D07G0194	0.5857	(0.0063 0.0107)	Gorai.001G023100	GOBAR_DD32448	0.4869	(0.0039 0.0079)	Gh_A01G1715	Gh_D01G1966	0.5708	(0.0104 0.0182)	GOBAR_AA00702	GOBAR_DD08298 BEL1	1.0688	(0.0508 0.0476)	Cotton_A_00390	Gorai.002G255800	0.2958	(0.0147 0.0496)
Cotton_A_00715	Gh_A03G1738	0.5928	(0.0039 0.0066)	Cotton_A_00715	GOBAR_AA14703 BLH6	1.4867	(0.0033 0.0022)	Gorai.001G125400	Gh_D07G1112	0.1774	(0.0026 0.0146)	Gorai.001G125400	GOBAR_DD02537	0.4827	(0.0089 0.0184)	Gh_A01G1895	Gh_D01G2154	0.3693	(0.0136 0.0368)	GOBAR_AA01682	GOBAR_DD16505	0.7326	(0.1551 0.2117)	Cotton_A_00715	Gorai.005G246400	0.3984	(0.0188 0.0471)
Cotton_A_01649	Gh_A02G1546	1.5564	(0.0131 0.0084)	Cotton_A_01649	GOBAR_AA24576	0.9834	(0.2005 0.2039)	Gorai.002G234900	Gh_D01G1966	0.8165	(0.0055 0.0068)	Gorai.002G234900	GOBAR_DD00460	0.929	(0.0211 0.0227)	Gh_A02G1546	Gh_D02G2171	0.2516	(1.0293 4.0917)	GOBAR_AA03086	GOBAR_DD00283	0.7407	(0.0610 0.0823)	Cotton_A_01649	Gorai.003G018100	0.4195	(0.0317 0.0757)
Cotton_A_02285	Gh_A01G1715	0.406	(0.0028 0.0068)	Cotton_A_02285	GOBAR_AA21686	0.6096	(0.0027 0.0045)	Gorai.002G255800	Gh_D01G2154	0.569	(0.0098 0.0173)	Gorai.002G255800	GOBAR_DD02893	0.1535	(0.0008 0.0052)	Gh_A03G0158	Gh_D03G0175	0.404	(0.6772 1.6759)	GOBAR_AA08170	GOBAR_DD29562	0.5484	(0.0586 0.1068)	Cotton_A_02285	Gorai.002G234900	0.2766	(0.0076 0.0274)
Cotton_A_04252	Gh_A03G0263	0.5907	(0.0064 0.0108)	Cotton_A_05613	GOBAR_AA28867	0.486	(0.0041 0.0084)	Gorai.003G018100	Gh_D03G0175	0.493	(0.0288 0.0584)	Gorai.003G018100	GOBAR_DD29752	0.9849	(0.1923 0.1953)	Gh_A03G0263	Gh_Sca004991G01	0.6591	(0.0444 0.0674)	GOBAR_AA11678	GOBAR_DD32448	0.2975	(0.9270 3.1156)	Cotton_A_04252	Gorai.003G143600	0.6532	(0.0457 0.0700)
Cotton_A_05613	Gh_A07G2327	0.4638	(0.0060 0.0130)	Cotton_A_07844	GOBAR_AA23983	0.2346	(0.0029 0.0122)	Gorai.003G143600	Gh_Sca004991G01	0.6577	(0.0091 0.0138)	Gorai.003G143600	GOBAR_DD24510	0.9743	(0.0504 0.0517)	Gh_A03G1738	Gh_D03G1427	N	(0.7937 9.0000)	GOBAR_AA11795	GOBAR_DD11471	0.8142	(0.0628 0.0772)	Cotton_A_05613	Gorai.001G023100	0.2017	(0.0093 0.0461)
Cotton_A_07844	Gh_A05G1633	0.078	(0.0010 0.0122)	Cotton_A_11086	GOBAR_AA21453	0.2354	(0.0042 0.0179)	Gorai.003G156000	Gh_D03G1427	1.9828	(0.0025 0.0013)	Gorai.003G156000	GOBAR_DD22176	0.962	(0.0405 0.0421)	Gh_A04G0478	Gh_D04G0880	0.8502	(0.0356 0.0418)	GOBAR_AA14143	GOBAR_DD28219	0.6859	(0.0632 0.0921)	Cotton_A_07844	Gorai.009G198500	0.1798	(0.0067 0.0373)
Cotton_A_11086	Gh_A05G0639	0.6585	(0.0138 0.0209)	Cotton_A_11675	GOBAR_AA33961	0.7581	(0.0517 0.0682)	Gorai.004G139300	Gh_D08G1276	0.4214	(0.0019 0.0045)	Gorai.004G139300	GOBAR_DD08298 BEL1	1.8	(0.0139 0.0077)	Gh_A04G0732	Gh_D04G1208	0.5918	(0.0307 0.0518)	GOBAR_AA14703	GOBAR_DD22176	N	(0.7413 9.0000)	Cotton_A_11086	Gorai.009G082700	0.6074	(0.0288 0.0473)
Cotton_A_11675	Gh_A03G0158	0.6779	(0.0201 0.0297)	Cotton_A_13481	GOBAR_AA08170	0.9411	(0.0020 0.0022)	Gorai.005G246400	Gh_D02G2171	0.8472	(0.0666 0.0786)	Gorai.005G246400	GOBAR_DD03846	0.6693	(0.0666 0.0996)	Gh_A05G0639	Gh_D05G0788	0.7104	(0.0338 0.0475)	GOBAR_AA17520	GOBAR_DD01341	0.6876	(0.0461 0.0671)	Cotton_A_11675	Gorai.003G156000	0.8151	(0.0541 0.0664)
Cotton_A_13481	Gh_A09G1263	1.5694	(0.0034 0.0022)	Cotton_A_19739	GOBAR_AA14143	0.8772	(0.0021 0.0024)	Gorai.006G115600	Gh_D09G0967	0.1653	(0.0030 0.0183)	Gorai.006G115600	GOBAR_DD12193	0.6262	(0.0221 0.0353)	Gh_A05G0912	Gh_D05G0993	0.6933	(0.0402 0.0579)	GOBAR_AA18167	GOBAR_DD37788	N	(1.6721 9.0000)	Cotton_A_13481	Gorai.006G149100	0.4	(0.0160 0.0400)
Cotton_A_19739	Gh_A13G2086	0.8772	(0.0021 0.0024)	Cotton_A_22674	GOBAR_AA37150	0.2308	(0.0020 0.0088)	Gorai.006G149100	Gh_D09G1263	0.6232	(0.0046 0.0073)	Gorai.006G149100	GOBAR_DD29562	0.6998	(0.0484 0.0691)	Gh_A05G1633	Gh_D05G1815	0.1281	(0.0048 0.0374)	GOBAR_AA21453	GOBAR_DD29867	0.6321	(0.0287 0.0454)	Cotton_A_19739	Gorai.013G034600	0.6718	(0.0260 0.0386)
Cotton_A_22674	Gh_A04G0732	0.6185	(0.0041 0.0066)	Cotton_A_25113	GOBAR_AA01682 部分5’BLH9	1.1106	(0.0283 0.0255)	Gorai.007G207200	Gh_D11G1889	0.7859	(0.0219 0.0279)	Gorai.007G207200	GOBAR_DD37788	N	(1.4701 9.0000)	Gh_A06G1844	Gh_D06G0029	1.4271	(0.0444 0.0311)	GOBAR_AA21686	GOBAR_DD00460	0.7896	(0.0254 0.0322)	Cotton_A_22674	Gorai.012G108300	0.5884	(0.0278 0.0473)
Cotton_A_25113	Gh_A10G2018	0.5742	(0.0031 0.0055)	Cotton_A_27212	GOBAR_AA03086	0.6104	(0.0472 0.0773)	Gorai.008G031100	Gh_D12G0275	0.1291	(0.0019 0.0148)	Gorai.008G031100	GOBAR_DD00283	0.0753	(0.0013 0.0170)	Gh_A06G1845	Gh_D06G0030	0.2947	(0.0154 0.0523)	GOBAR_AA22340	GOBAR_DD34488	0.7888	(0.0461 0.0584)	Cotton_A_25113	Gorai.011G271200	0.4952	(0.0223 0.0449)
Cotton_A_27212	Gh_A12G0390	0.816	(0.0122 0.0150)	Cotton_A_27212	GOBAR_AA33051 BLH6	1.0557	(0.0135 0.0128)	Gorai.008G070800	Gh_D12G0641	1.0164	(0.0073 0.0072)	Gorai.008G070800	GOBAR_DD11471 BLH2	1.0958	(0.0079 0.0072)	Gh_A07G1033	Gh_D07G0194	0.3649	(0.9433 2.5851)	GOBAR_AA23983	GOBAR_DD21207	0.1722	(0.0048 0.0278)	Cotton_A_27212	Gorai.008G031100	0.3364	(0.0208 0.0618)
Cotton_A_27417	Gh_A05G0912	0.7499	(0.0167 0.0223)	Cotton_A_27417	GOBAR_AA22340	0.7738	(0.0311 0.0402)	Gorai.008G248900	Gh_D12G2283	0.6883	(0.0163 0.0237)	Gorai.008G248900	GOBAR_DD33926	0.5572	(0.0109 0.0195)	Gh_A07G2327	Gh_D07G1112	0.315	(0.9896 3.1420)	GOBAR_AA24576	GOBAR_DD03846	0.2179	(0.9282 4.2596)	Cotton_A_27417	Gorai.009G109300	0.4326	(0.0186 0.0431)
Cotton_A_30275	Gh_A09G0940	0.3743	(0.0033 0.0089)	Cotton_A_30275	GOBAR_AA39171	0.671	(0.0152 0.0226)	Gorai.009G082700	Gh_D05G0788	0.7925	(0.0141 0.0178)	Gorai.009G082700	GOBAR_DD29867	0.7673	(0.0061 0.0079)	Gh_A08G1004	Gh_D08G1276	0.9745	(0.0964 0.0990)	GOBAR_AA28867	GOBAR_DD02537	0.2374	(0.9153 3.8562)	Cotton_A_30275	Gorai.006G115600	0.1327	(0.0056 0.0425)
Cotton_A_32708	Gh_A12G2682	0.0717	(0.0007 0.0094)	Cotton_A_33133	GOBAR_AA18167	0.9422	(0.2635 0.2797)	Gorai.009G109300	Gh_D05G0993	0.8505	(0.0159 0.0186)	Gorai.009G109300	GOBAR_DD34488	0.7962	(0.0331 0.0416)	Gh_A09G0940	Gh_D09G0967	0.2549	(0.0084 0.0330)	GOBAR_AA33051	GOBAR_DD00283	0.2836	(0.0162 0.0570)	Cotton_A_32708	Gorai.008G248900	0.5462	(0.0235 0.0430)
Cotton_A_33133	Gh_A11G1730	0.8216	(0.0659 0.0802)	Cotton_A_34090	GOBAR_AA11795	0.8096	(0.0492 0.0607)	Gorai.009G198500	Gh_D05G1815	N	(0.0019 0.0000)	Gorai.009G198500	GOBAR_DD21207	0.6284	(0.0019 0.0030)	Gh_A09G1263	Gh_D09G1263	0.3496	(0.0117 0.0334)	GOBAR_AA33285	GOBAR_DD23547 BLH11	1.6924	(0.0444 0.0263)	Cotton_A_33133	Gorai.007G207200	0.6624	(0.0452 0.0683)
Cotton_A_34090	Gh_A12G0624	0.4354	(0.0039 0.0089)	Cotton_A_35263	GOBAR_AA11678	0.4682	(0.0019 0.0041)	Gorai.009G396900	Gh_D04G0880	1.0603	(0.0275 0.0259)	Gorai.009G396900	GOBAR_DD01341	0.7165	(0.0473 0.0660)	Gh_A10G2018	Gh_D10G2508	0.5292	(0.0238 0.0451)	GOBAR_AA33911	GOBAR_DD02893	0.3695	(0.0250 0.0677)	Cotton_A_34090	Gorai.008G070800	0.9342	(0.0176 0.0188)
Cotton_A_35263	Gh_A07G1033	0.468	(0.0019 0.0041)	Cotton_A_35898	GOBAR_AA00702	0.7339	(0.0290 0.0395)	Gorai.010G007700	Gh_D06G0029	2.1748	(0.0101 0.0046)	Gorai.010G007700	GOBAR_DD23547	N	(0.0101 0.0000)	Gh_A10G2019	Gh_D10G2509	0.4402	(0.0130 0.0295)	GOBAR_AA33961	GOBAR_DD29752	0.444	(0.6841 1.5408)	Cotton_A_35263	Gorai.001G125400	0.4919	(0.0124 0.0251)
Cotton_A_35898	Gh_A08G1004	0.8453	(0.0723 0.0855)	Cotton_A_36823	GOBAR_AA33285 BLH11	2.7629	(0.0154 0.0029)	Gorai.010G007800	Gh_D06G0030	0.3007	(0.0050 0.0165)	Gorai.010G007800	GOBAR_DD23550	0.362	(0.0050 0.0137)	Gh_A11G1730	Gh_D11G1889	0.3453	(0.0109 0.0316)	GOBAR_AA37150	GOBAR_DD03529	0.6132	(0.0427 0.0697)	Cotton_A_35898	Gorai.004G139300	1.2767	(0.0457 0.0358)
Cotton_A_36822	Gh_A06G1845	0.6465	(0.0443 0.0686)	Cotton_A_39756	GOBAR_AA17520	0.4908	(0.0054 0.0109)	Gorai.011G271200	Gh_D10G2508	N	(0.0016 0.0000)	Gorai.011G271200	GOBAR_DD16505	0.9266	(0.1112 0.1200)	Gh_A12G0390	Gh_D12G0275	0.2703	(0.0141 0.0522)	GOBAR_AA39171	GOBAR_DD12193	0.6384	(0.0474 0.0743)	Cotton_A_36822	Gorai.010G007800	0.5601	(0.0545 0.0974)
Cotton_A_36823	Gh_A06G1844	2.7616	(0.0154 0.0029)					Gorai.011G271900	Gh_D10G2509	N	(0.0052 0.0000)	Gorai.012G108300	GOBAR_DD03529	0.2726	(0.0055 0.0200)	Gh_A12G0624	Gh_D12G0641	0.8444	(0.0152 0.0180)					Cotton_A_36823	Gorai.010G007700	1.9962	(0.0428 0.0215)
Cotton_A_39756	Gh_A04G0478	0.6151	(0.0040 0.0065)					Gorai.012G108300	Gh_D04G1208	0.2055	(0.0014 0.0066)	Gorai.013G034600	GOBAR_DD28219	0.6984	(0.0382 0.0547)	Gh_A12G2682	Gh_D12G2283	0.3753	(0.0112 0.0299)					Cotton_A_39756	Gorai.009G396900	0.3326	(0.0141 0.0425)
								Gorai.013G034600	Gh_D13G0314	0.6151	(0.0066 0.0107)					Gh_A13G2086	Gh_D13G0314	0.8507	(0.0278 0.0326)
KNOX family
A2/GhAt		Ka/Ks	（Ka Ks）	A2/GbAt		Ka/Ks	（Ka Ks）	D5/GhDt		Ka/Ks	（Ka Ks）	D5/GbDt		Ka/Ks	（Ka Ks）	GhAt/GhDt		Ka/Ks	（Ka Ks）	GbAt/GbDt		Ka/Ks	（Ka Ks）	A2/D5		Ka/Ks	（Ka Ks）
Cotton_A_01196	Gh_A05G0463	0.2019	(0.0020 0.0101)	Cotton_A_01196	GOBAR_AA27671	0.3023	(0.0031 0.0102)	Gorai.001G035700	Gh_D07G0302	N	(0.0040 0.0000)	Gorai.001G035700	GOBAR_DD18715	1.0576	(0.0422 0.0399)	Gh_A02G0822	Gh_D02G0870-71	0.7991	(0.0262 0.0328)	GOBAR_AA00193	GOBAR_DD05999	0.1969	(0.0097 0.0491)	Cotton_A_01196	Gorai.009G060200	0.5513	(0.0160 0.0291)
Cotton_A_04656	Gh_A05G1484	0.4732	(0.0054 0.0114)	Cotton_A_04656	GOBAR_AA36187	0.7092	(0.0216 0.0304)	Gorai.003G163800	Gh_D03G1492	0.0814	(0.0029 0.0354)	Gorai.003G163800	GOBAR_DD28784	0.0718	(0.0014 0.0201)	Gh_A03G1199	Gh_D02G1633	0.1077	(0.0041 0.0384)	GOBAR_AA05463	GOBAR_DD00010	1.325	(0.0278 0.0210)	Cotton_A_04656	Gorai.009G181500	0.8976	(0.0656 0.0730)
Cotton_A_08384	Gh_A06G0419	1.2227	(0.0523 0.0428)	Cotton_A_08384	GOBAR_AA33210	0.585	(0.0032 0.0056)	Gorai.004G236400	Gh_D08G2181	1.6532	(0.0089 0.0054)	Gorai.004G206600	GOBAR_DD12226	0.146	(0.0014 0.0099)	Gh_A03G2005	Gh_D03G1492	0.2516	(0.0116 0.0461)	GOBAR_AA07614	GOBAR_DD06571	0.5043	(0.0559 0.1107)	Cotton_A_08384	Gorai.010G056100	0.3507	(0.0074 0.0211)
Cotton_A_08468	Gh_A10G0104	0.4355	(0.0060 0.0139)	Cotton_A_08468	GOBAR_AA39074	0.3924	(0.0036 0.0092)	Gorai.005G098100	Gh_D02G0870-71	0.8494	(0.0191 0.0224)	Gorai.004G236400	GOBAR_DD31327	1.3746	(0.0074 0.0054)	Gh_A05G0046	Gh_D05G0099	0.2859	(0.0015 0.0051)	GOBAR_AA07985	GOBAR_DD32225	0.2492	(0.0299 0.1200)	Cotton_A_08468	Gorai.011G011700	0.4354	(0.0416 0.0957)
Cotton_A_09092	Gh_A13G1595	0.856	(0.0430 0.0503)	Cotton_A_09092	GOBAR_AA38245	0.5898	(0.0147 0.0248)	Gorai.005G180500	Gh_D02G1633	0.3896	(0.0055 0.0142)	Gorai.005G098100	GOBAR_DD00010	1.3995	(0.0292 0.0209)	Gh_A05G0463	Gh_D05G3920	0.2065	(0.0092 0.0448)	GOBAR_AA11540	GOBAR_DD28784	0.2845	(0.0087 0.0306)	Cotton_A_09092	Gorai.013G213900	0.4876	(0.0261 0.0536)
Cotton_A_09961	Gh_A08G1599	0.5915	(0.0030 0.0050)	Cotton_A_09961	GOBAR_AA33946	0.1956	(0.0030 0.0152)	Gorai.007G306500	Gh_D11G2813	N	(0.0000 0.0095)	Gorai.005G180500	GOBAR_DD32225	0.4021	(0.0271 0.0674)	Gh_A05G1484	Gh_D05G1655	0.7996	(0.0652 0.0815)	GOBAR_AA12213	GOBAR_DD30120	0.5851	(0.0859 0.1468)	Cotton_A_09961	Gorai.004G206600	0.2198	(0.0045 0.0203)
Cotton_A_10669	Gh_A11G2492	N	(0.0067 0.0000)	Cotton_A_10669	GOBAR_AA37828	0.6676	(0.0350 0.0524)	Gorai.008G242800	Gh_D12G2227	0.2887	(0.0028 0.0099)	Gorai.007G306500	GOBAR_DD19691	0.284	(0.0028 0.0097)	Gh_A05G1857	Gh_D05G2055	0.3513	(0.5983 1.7033)	GOBAR_AA16681	GOBAR_DD31062	0.0762	(0.0043 0.0560)	Cotton_A_10669	Gorai.007G306500	0.5693	(0.0135 0.0238)
Cotton_A_14429	Gh_A12G2049	N	(0.0000 0.0149)	Cotton_A_14429	GOBAR_AA16681	N	(0.0000 0.0099)	Gorai.008G291600	Gh_D12G2573	0.7021	(0.0434 0.0619)	Gorai.008G242800	GOBAR_DD31062	0.2887	(0.0028 0.0099)	Gh_A05G2722	Gh_D05G3025	0.1874	(0.0083 0.0442)	GOBAR_AA21503	GOBAR_DD32894	0.2056	(0.0035 0.0169)	Cotton_A_11503	Gorai.009G012300	0.0564	(0.0015 0.0258)
Cotton_A_18479	Gh_A08G1820	0.6889	(0.0430 0.0624)	Cotton_A_18479	GOBAR_AA30690	1.3718	(0.0074 0.0054)	Gorai.008G296800	Gh_D12G2623	N	(0.0057 0.0000)	Gorai.008G291600	GOBAR_DD19507	0.124	(0.0027 0.0220)	Gh_A06G0419	Gh_D06G0457	0.8806	(0.0603 0.0685)	GOBAR_AA23908	GOBAR_DD19507	0.143	(0.0124 0.0864)	Cotton_A_14429	Gorai.008G242800	0.1567	(0.0071 0.0455)
Cotton_A_19190	Gh_A07G0245	1.1458	(0.0376 0.0328)	Cotton_A_19190	GOBAR_AA35739	0.1689	(0.0952 0.5634)	Gorai.009G012300	Gh_D05G0099	N	(0.0000 0.0206)	Gorai.008G296800	GOBAR_DD30937	1.4294	(0.0071 0.0050)	Gh_A06G0906	Gh_D06G1066	0.1664	(0.0111 0.0665)	GOBAR_AA27671	GOBAR_DD02617	0.223	(0.0093 0.0416)	Cotton_A_18479	Gorai.004G236400	0.633	(0.0209 0.0329)
Cotton_A_23799	Gh_A03G1199	0.8027	(0.0817 0.1018)	Cotton_A_23799	GOBAR_AA07985	0.9031	(0.0989 0.1096)	Gorai.009G060200	Gh_D05G3920	0.8144	(0.0082 0.0101)	Gorai.009G012300	GOBAR_DD23558	0.6546	(0.0952 0.1454)	Gh_A06G1334	Gh_D06G1663	0.5461	(0.0428 0.0784)	GOBAR_AA27727	GOBAR_DD23558	0.7784	(0.0952 0.1223)	Cotton_A_19190	Gorai.001G035700	0.3376	(0.0172 0.0511)
Cotton_A_25268	Gh_A06G1864	1.1705	(0.0460 0.0393)	Cotton_A_25268	GOBAR_AA12213	1.005	(0.1427 0.1420)	Gorai.009G181500	Gh_D05G1655	1.8948	(0.0084 0.0045)	Gorai.009G060200	GOBAR_DD02617	0.6844	(0.0093 0.0136)	Gh_A06G1864	Gh_D06G0225	0.5633	(0.0475 0.0843)	GOBAR_AA28519	GOBAR_DD07053	0.068	(0.0014 0.0200)	Cotton_A_23799	Gorai.005G180500	0.5221	(0.0842 0.1612)
Cotton_A_26598	Gh_A12G2495	0.2823	(0.0014 0.0050)	Cotton_A_26598	GOBAR_AA33085	N	(0.0028 0.0000)	Gorai.009G223200	Gh_D05G2055	0.2755	(0.0017 0.0063)	Gorai.009G181500	GOBAR_DD22862	0.9302	(0.0297 0.0319)	Gh_A07G0245	Gh_D07G0302	0.8453	(0.0429 0.0508)	GOBAR_AA30690	GOBAR_DD31327	0.9623	(0.0210 0.0218)	Cotton_A_25268	Gorai.010G029000	0.3033	(0.0133 0.0439)
Cotton_A_27818	Gh_A05G1857	0.9316	(0.0801 0.0859)	Cotton_A_27818	GOBAR_AA21503	0.697	(0.0499 0.0716)	Gorai.009G336900	Gh_D05G3025	0.1137	(0.0027 0.0242)	Gorai.009G223200	GOBAR_DD32894	0.2517	(0.0102 0.0404)	Gh_A08G1820	Gh_D08G2181	0.6556	(0.0548 0.0836)	GOBAR_AA33085	GOBAR_DD30937	2.5872	(0.0128 0.0050)	Cotton_A_26598	Gorai.008G296800	1.4198	(0.0143 0.0100)
Cotton_A_28247	Gh_A06G0906	0.7827	(0.0640 0.0817)	Cotton_A_28415	GOBAR_AA11540	0.095	(0.0014 0.0152)	Gorai.010G029000	Gh_D06G0225	0.5404	(0.0063 0.0117)	Gorai.009G336900	GOBAR_DD05999	0.1142	(0.0028 0.0241)	Gh_A10G0104	Gh_D10G0108	0.56	(0.0495 0.0883)	GOBAR_AA33210	GOBAR_DD04702	0.4182	(0.0105 0.0252)	Cotton_A_27818	Gorai.009G223200	0.6055	(0.0612 0.1010)
Cotton_A_28415	Gh_A03G2005	0.1903	(0.0029 0.0151)	Cotton_A_33669	GOBAR_AA00193	0.5753	(0.0028 0.0048)	Gorai.010G056100	Gh_D06G0457	0.8337	(0.0045 0.0054)	Gorai.010G029000	GOBAR_DD30120	0.8564	(0.0768 0.0897)	Gh_A11G2492	Gh_D11G2813	0.6673	(0.0094 0.0142)	GOBAR_AA33946	GOBAR_DD12226	N	(0.0000 0.0148)	Cotton_A_28247	Gorai.010G117100	0.675	(0.0692 0.1025)
Cotton_A_33669	Gh_A05G2722	N	(0.0014 0.0000)	Cotton_A_33973	GOBAR_AA07614	0.2277	(0.0058 0.0253)	Gorai.010G117100	Gh_D06G1066	0.8925	(0.0121 0.0135)	Gorai.010G056100	GOBAR_DD04702	0.4177	(0.0052 0.0125)	Gh_A12G2049	Gh_D12G2227	0.0696	(0.0043 0.0613)	GOBAR_AA35739	GOBAR_DD18715	0.1854	(0.1161 0.6263)	Cotton_A_28415	Gorai.003G163800	0.153	(0.0087 0.0567)
Cotton_A_33973	Gh_A06G1334	0.5061	(0.0173 0.0342)	Cotton_A_34107	GOBAR_AA28519	0.548	(0.0082 0.0150)	Gorai.010G183800	Gh_D06G1663	1.0132	(0.0406 0.0401)	Gorai.010G183800	GOBAR_DD06571	0.7247	(0.0765 0.1055)	Gh_A12G2447	Gh_D12G2573	0.1173	(0.0078 0.0662)	GOBAR_AA36187	GOBAR_DD22862	0.421	(0.0182 0.0432)	Cotton_A_33669	Gorai.009G336900	0.1162	(0.0069 0.0595)
Cotton_A_34107	Gh_A13G0926	0.3648	(0.0055 0.0150)	Cotton_A_34157	GOBAR_AA05463	0.6157	(0.0233 0.0379)	Gorai.011G011700	Gh_D10G0108	0.4463	(0.0115 0.0257)	Gorai.011G011700	GOBAR_DD25125	0.6396	(0.0512 0.0801)	Gh_A12G2495	Gh_D12G2623	0.8547	(0.0128 0.0150)	GOBAR_AA37828	GOBAR_DD19691	0.5977	(0.0419 0.0700)	Cotton_A_33973	Gorai.010G183800	0.7504	(0.0667 0.0888)
Cotton_A_34157	Gh_A02G0822	1.6959	(0.0083 0.0049)					Gorai.013G129400	Gh_D13G1173	N	(0.0041 0.0000)	Gorai.013G129400	GOBAR_DD07053	0.2756	(0.0014 0.0050)	Gh_A13G0926	Gh_D13G1173	0.8283	(0.0041 0.0049)	GOBAR_AA38245	GOBAR_DD34318	0.4577	(0.0171 0.0373)	Cotton_A_34107	Gorai.013G129400	0.4107	(0.0082 0.0200)
								Gorai.013G213900	Gh_D13G1956	0.7253	(0.0922 0.1272)	Gorai.013G213900	GOBAR_DD34318	0.5756	(0.0239 0.0416)	Gh_A13G1595	Gh_D13G1956	0.699	(0.1161 0.1661)	GOBAR_AA39074	GOBAR_DD25125	0.5698	(0.0802 0.1408)	Cotton_A_34157	Gorai.005G098100	1.2323	(0.0182 0.0147)
N: No result
